# Supplementary material for: Excitation and propagation of surface plasmon polaritons on a non-structured surface with a permittivity gradient
Source: PubMed Central journal article supplement — Light Sci Appl. 2016 Dec 2;5(12):e16179–. doi: 10.1038/lsa.2016.179 (PMC6059887; doi:10.1038/lsa.2016.179), 2016-12-02
Supplement: lsa2016179x1.pdf [file lsa2016179x1.pdf]

Supplementary Information for

## **Excitation and propagation of surface plasmon polaritons on a non-structured surface with a permittivity gradient**

**Xi Wang<sup>1</sup>, Yang Deng<sup>1</sup>, Qitong Li<sup>1</sup>, Yijing Huang<sup>1</sup>, Zilun Gong<sup>1,2</sup>, Kyle Tom<sup>1,3</sup> and Jie Yao<sup>1,3</sup>**

*<sup>1</sup>Department of Materials Science and Engineering, University of California, Berkeley, California 94720, USA*

*<sup>2</sup>Environmental Energy Technologies Division, Lawrence Berkeley National Laboratory, Berkeley, California 94720, USA*

*<sup>3</sup>Materials Sciences Division, Lawrence Berkeley National Laboratory, Berkeley, California 94720, USA*

*yaojie@berkeley.edu*

### Supplemental 1:

We started from solving the curl equations of Maxwell's equations by considering harmonic time dependence  $e^{-i\omega t}$  and only one set of self-consistent solutions for a TM polarized ( $H_x=H_z=0, E_y=0$ ) wave.

$$\begin{cases} \frac{\partial E_x}{\partial z} - \frac{\partial E_z}{\partial x} = i\omega\mu_0 H_y \\ \frac{\partial H_z}{\partial y} - \frac{\partial H_y}{\partial z} = -i\omega\varepsilon_0\varepsilon E_x \\ \frac{\partial H_y}{\partial x} - \frac{\partial H_x}{\partial y} = -i\omega\varepsilon_0\varepsilon E_z \end{cases} \quad (1)$$

where  $\omega$  is the angular frequency of the wave,  $\mu_0$  and  $\varepsilon_0$  are the vacuum permeability and permittivity respectively, and  $\varepsilon$  is the relative permittivity. Applying a condition of homogeneous properties along the  $y$  direction, we can get:

$$\begin{cases} \left[ \frac{\partial^2}{\partial z^2} + \varepsilon(x) \frac{\partial}{\partial x} \left( \frac{1}{\varepsilon(x)} \frac{\partial}{\partial x} \right) + k_0^2 \varepsilon(x) \right] H_y = 0 \\ E_x = -i \frac{1}{\omega\varepsilon_0\varepsilon} \frac{\partial H_y}{\partial z} \\ E_z = i \frac{1}{\omega\varepsilon_0\varepsilon} \frac{\partial H_y}{\partial x} \end{cases} \quad (2)$$

where  $k_0=\omega/c$  is the free space wave vector.

Since materials are homogeneous along the  $z$  direction in each half space ( $z>0$  and  $z<0$  respectively), we can decouple  $H_y$  as:

$$\begin{cases} H_y = G(x)e^{-k_{zd}(x)z}, z > 0, \text{Re}(k_{zd}(x)) > 0 \\ H_y = G(x)e^{k_{zm}(x)z}, z < 0, \text{Re}(k_{zm}(x)) > 0 \end{cases} \quad (3)$$

where  $G(x) = H_y(x, z = 0)$  describes the magnetic field at the interface; and  $k_{zd}$  and  $k_{zm}$  are the decay factors of the SPP in air and in the GNM, respectively.

Thus,  $E_x$  can be rewritten as:

$$E_x = -i \frac{1}{\omega \varepsilon_0 \varepsilon} \frac{\partial H_y}{\partial z} = \begin{cases} i \frac{k_{zd}(x)}{\omega \varepsilon_0 \varepsilon_d} G(x) e^{-k_{zd}(x)z}, z > 0 \\ -i \frac{k_{zm}(x)}{\omega \varepsilon_0 \varepsilon_m(x)} G(x) e^{k_{zm}(x)z}, z < 0 \end{cases} \quad (4)$$

At the interface ( $z=0$ ), by combining Eq. (1) and (2), we get:

$$\begin{cases} \frac{\partial^2 G(x)}{\partial x^2} - \frac{\varepsilon_m'(x)}{\varepsilon_m(x)} \frac{\partial G(x)}{\partial x} + (k_0^2 \varepsilon_m(x) + k_{zm}^2(x)) G(x) = 0 \\ \frac{\partial^2 G(x)}{\partial x^2} + (k_0^2 \varepsilon_d + k_{zd}^2(x)) G(x) = 0 \rightarrow k_{zd}^2(x) = -(k_0^2 \varepsilon_d + \frac{G''(x)}{G(x)}) \end{cases} \quad (5)$$

Also, when  $z=0$ , continuity of tangential fields ( $H_y$  and  $E_x$ ) yields that: (from (3) and

(4))

$$\frac{k_{zd}(x)}{k_{zm}(x)} = \frac{-\varepsilon_d}{\varepsilon_m(x)} \rightarrow k_{zm}(x) = -\frac{k_{zd}(x) \varepsilon_m(x)}{\varepsilon_d} \quad (6)$$

Solving the second order differential equation group (5) with equation (6), we have:

$$G''(x) + \frac{\varepsilon_m'(x) \varepsilon_d^2}{\varepsilon_m(x) [\varepsilon_m^2(x) - \varepsilon_d^2]} G'(x) + k_0^2 \frac{\varepsilon_m(x) \varepsilon_d}{\varepsilon_m(x) + \varepsilon_d} G(x) = 0 \quad (7)$$

## Supplemental 2:

The basic relationship in the gradient-index material system:

$$\varepsilon = 1 + \chi$$

$$P = \varepsilon_0 \chi E$$

The coupling between propagating waves and surface waves can be explained by single layer inhomogeneous dipole radiation at the interface. Consider a single dipole at the interface of the GNM with the coordinates  $(x', 0, 0)$  illuminated by a normally incident  $x$ -polarized plane wave:

$$dp(x', t) = e^{-i\omega t} \varepsilon_0 \chi(x') E_0 dv' = E_0 e^{-i\omega t} \varepsilon_0 \chi(x') dx' dy' dz' = E_0 e^{-i\omega t} \varepsilon_0 \chi(x') \Delta z dx'$$

where  $x'$  represents the position vector of the dipole. We set the effective length along the  $z$  axis as  $\Delta z$  and neglect the  $y$  coordinate in the calculation since the system is insensitive along the  $y$  axis and  $k_y$  should always be kept as zero. In the GNM, the permittivity is not a constant and can be expressed as  $\varepsilon(x')$ . As a result, the polarizability also should be rewritten as  $\chi(x')$ , which indicates the inhomogeneity of the GNM.

Now we write the standard form of the radiation field of the single dipole first:

$$H(r, t, x') = \frac{-\omega^2}{4\pi c |r - x'|} dp(x', t) \sin(\theta) e^{ik|r-x'|} e^{-i\omega t} \varphi(r, x')$$

Where  $\theta$  and  $\varphi$  represent the elevation angle of the  $x$ -axis and the azimuth angle in the  $y$ - $z$  plane, respectively. Here we set  $(x', 0, 0)$  as the origin of the coordinate and  $\varphi$  as the unit vector along local  $\varphi$ -axis. Thus, the radiation field of a single dipole at the interface of the GNM has the form below:

$$H(r, t, x') = \frac{-\omega^2}{4\pi c |r-x'|} E_0 e^{-i\omega t} \varepsilon_0 \chi(x') \Delta z dx' \cdot \sin(\theta) e^{ik|r-x'|} e^{-i\omega t} \varphi(r, x')$$

In the 2D case, the total radiation field should be given by an infinite row of  $x$ -polarized dipoles along the  $x$ -axis:

$$H(r, t, x') = \int \frac{-\omega^2}{4\pi c |r-x'|} E_0 e^{-i\omega t} \varepsilon_0 \chi(x') \Delta z \cdot \sin(\theta) e^{ik|r-x'|} e^{-i\omega t} \varphi(r, x') dx'$$

Then, the spatial spectra of the radiation field equals to:

$$\begin{aligned} H_{\text{total}}(k_x, k_y = 0) &= \int H_{\text{total}}(r, t) e^{-ik_x x} dx dy \\ &= \int e^{-ik_x x} dx dy \int \frac{-\omega^2}{4\pi c |r-x'|} E_0 e^{-i\omega t} \varepsilon_0 \chi(x') \Delta z \cdot \sin(\theta) e^{ik|r-x'|} e^{-i\omega t} \varphi(r, x') dx' \end{aligned}$$

We change the integral order and use the variable transformation:

$$\begin{aligned} H_{\text{total}}(k_x, k_y = 0) &= \int dx' \int \frac{-\omega^2}{4\pi c |r-x'|} E_0 e^{-i\omega t} \varepsilon_0 \chi(x') \Delta z \cdot \sin(\theta) e^{ik|r-x'|} e^{-i\omega t} \varphi(r, x') e^{-ik_x x} dx dy \\ &= \int \chi(x') e^{-ik_x x'} dx' \int \frac{-\omega^2}{4\pi c r} E_0 e^{-i\omega t} \varepsilon_0 \Delta z \cdot \sin(\theta) e^{ikr} e^{-i\omega t} \varphi(r, x') e^{-ik_x x} dx dy \\ &= A \int \chi(x') e^{-ik_x x'} dx' \end{aligned}$$

Where  $A$  represents the spatial frequency spectra of the single dipole.

According to the ref. <sup>33</sup>,  $A$  should have the form below:

$$H_y(k_x, z) \propto [p_z \frac{k_x}{k_z} - p_x] e^{ik_z z}, z > 0$$

In our case, since  $p_z = 0$ ,  $|A|$  should equal a constant when  $k_x$  changes. Thus, we can focus on the formula:

$$\int \chi(x') e^{-ik_x x'} dx'$$

We calculate the integral as the function of  $k_x$  and can then get the relative coefficient of the spatial frequency spectra as shown in Figure 1(d).
